# Supplementary material
Source: MDPI journal article supplement (https://www.mdpi.com/2071-1050/14/3/1711)
Supplement: s1 [file s1]

## Supplementary Material

### 1. Simulation of sugarcane combustion

#### 1.1. General scheme

The heat and power generation from the combustion of sugarcane in a Mexican mill was simulated using Aspen Plus v9.0 using data from literature and primary sources. Figure S1 shows a schematic diagram of this system. First, the biomass is burnt in a furnace, the resulting ashes and combustion gases are separated. The amount of air was estimated considering the required oxygen to undertake complete combustion (according to stoichiometry) and a typical excess of 50%. The hot combustion gases are then cooled down in a heat exchanger to generate high-pressure steam, subsequently generating heat and power. The following sections explain in more detail the assumptions of the simulation.

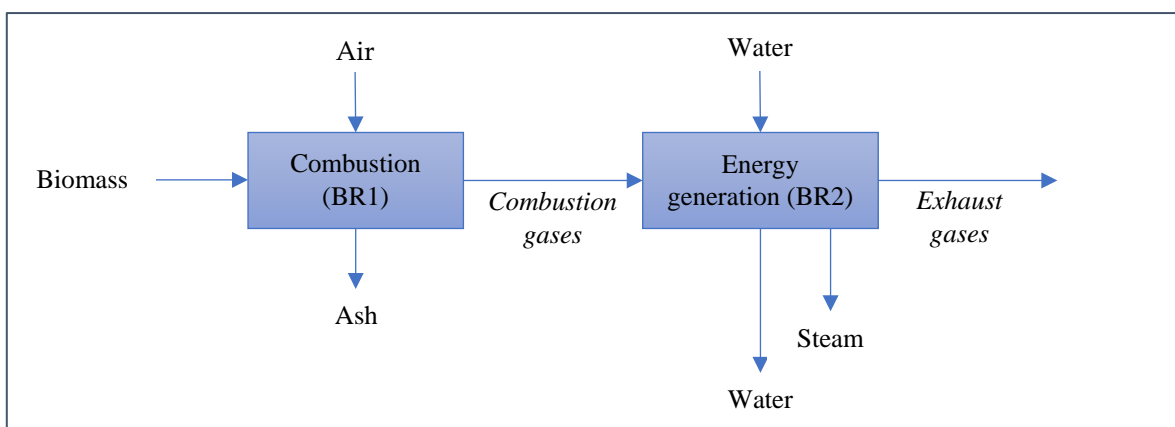

Figure S1. Schematic diagram of the heat and power generation from biomass.

#### 1.2. Composition of air and biomass

##### 1.2.1. Chemical composition of the air

The chemical composition of the air was simulated considering the weather conditions of Veracruz, Mexico, and Lenntech's relative humidity calculator [1,2]. Table S1 shows the resulting chemical composition of the air.

**Table S1.** Chemical composition of the air.

| Compound                 | Unit    | Value     |
|--------------------------|---------|-----------|
| Water content in the air | g/kg    | 14.10     |
| N <sub>2</sub>           | mol/mol | 78.084000 |
| O <sub>2</sub>           | mol/mol | 20.946000 |
| H <sub>2</sub>           | mol/mol | 0.000055  |
| CO <sub>2</sub>          | mol/mol | 0.035000  |
| CO                       | mol/mol | 0.000010  |
| N <sub>2</sub> O         | mol/mol | 0.000030  |
| NO <sub>2</sub>          | mol/mol | 0.000002  |
| Argon                    | mol/mol | 0.934000  |
| CH <sub>4</sub>          | mol/mol | 0.000179  |

Source: Own elaboration based on the weather conditions of Veracruz, Mexico, and Lenntech's relative humidity calculator [1,2].

### 1.2.2. Chemical composition of the biomass

Sugarcane bagasse was modeled as a non-conventional solid whose chemical composition (provided by the sugarcane facility) is summarized in Table S2.

**Table S2.** Chemical composition of the biomass.

| Parameter                | Unit  | Value |
|--------------------------|-------|-------|
| Calorific value          | MJ/kg | 15.1  |
| <b>Ultanal analysis</b>  |       |       |
| Carbon                   | w/w   | 46.2% |
| Hydrogen                 | w/w   | 5.6%  |
| Oxygen                   | w/w   | 45.6% |
| Nitrogen                 | w/w   | 0.2%  |
| Chlorine                 | w/w   | 0.0%  |
| Sulfur                   | w/w   | 0.2%  |
| Ash                      | w/w   | 2.2%  |
| <b>Proximal analysis</b> |       |       |
| Moisture                 | w/w   | 49.3% |
| Fixed carbon             | w/w   | 14.0% |
| Volatile matter          | w/w   | 80.4% |

Source: Sugarcane facility. Questionaries.

## 1.3. Simulation

### 1.3.1. General simulation scheme

Figure S2 shows the general scheme of the simulation of sugarcane combustion. The activities involved in this process were gathered in a set of hierarchies according to the schematic diagram in Figure S2. Thus, blocks B1 and B2 refer to the combustion and energy processes, respectively. The Peng-Robinson equation of state with Boston-Mathias modifications (PR-BM) thermodynamic model

was used to perform the simulation according to the metrics established by guidelines of the Aspen Plus software on handling solids [3]. A flow of 375,874 t of biomass (wet basis) per year (4237 hours per year) was used as a computation base of the simulation to model the real-life conditions of the combustion of sugarcane bagasse in a Mexican mill. Both the reference and the alternative systems have the same general simulation scheme.

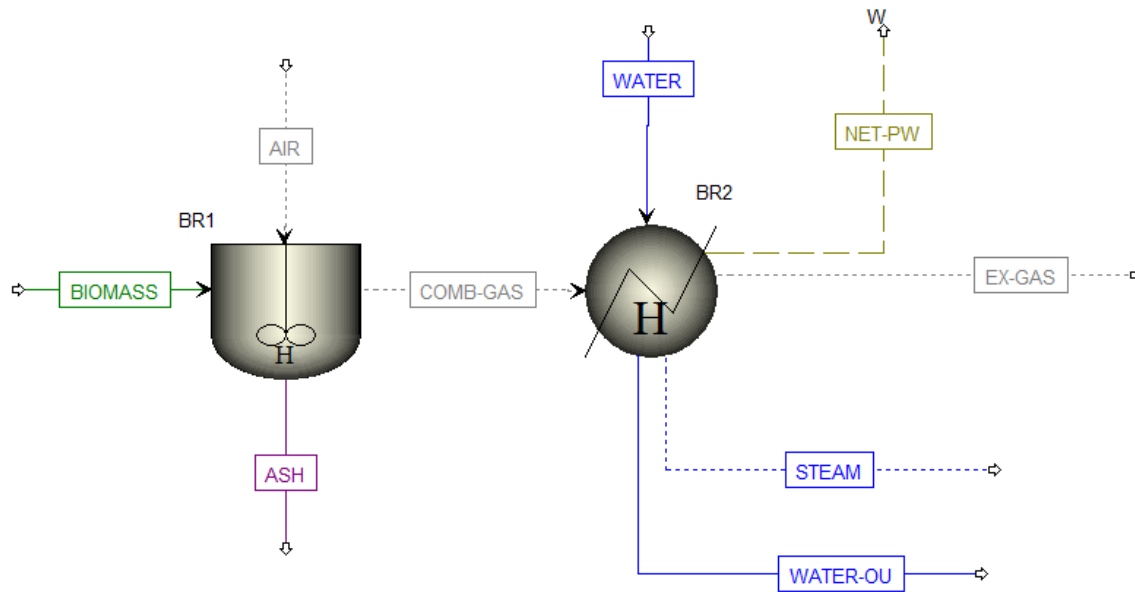

**Figure S2.** General scheme of the simulation of biomass combustion.

Source: Own elaboration.

Table S3 summarizes the mass balance of the reference and alternative scenarios. In both cases, the sugarcane mill requires 95 MW heat for internal purposes, which are fulfilled by the combustion of the sugarcane bagasse. However, in the reference scenario, the mill generates 5 MWe, which implies an electrical efficiency of 2.6% or the generation of 0.11 kWhe per kg of dry biomass. In the alternate scenario, on the other hand, the mill generates 12 MWe power, which implies an electrical efficiency of 6.3% or the generation of 0.26 kWhe per kg of dry biomass. The following sections explain in detail each of the hierarchies of the general scheme of the simulation (Figure S2).

#### Simulation of the hierarchy BR1

Figure S3 shows the simulation scheme of the hierarchy BR1, which models the combustion of the sugarcane bagasse depicted in Figure S1. Table S4 shows the input data of the blocks simulated in this hierarchy and their results. These conditions are the same for both the reference and alternative scenarios.

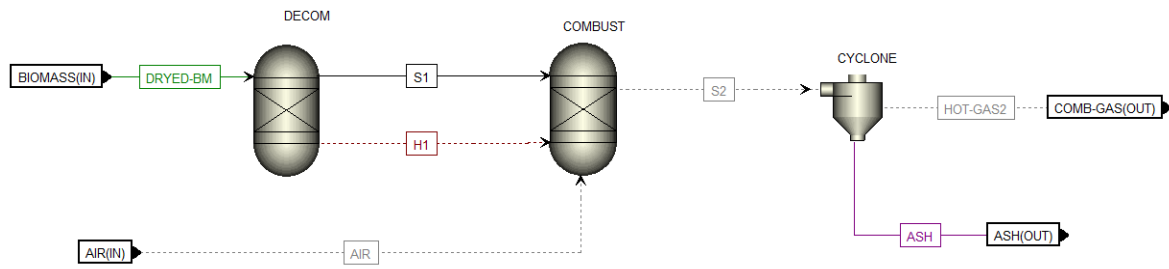

**Figure S3.** Scheme of the hierarchy BR1, the combustion stage.

Source: Own elaboration.

**Table S3.** Results of the main streams of the simulation.

| Parameter         | Unit | Input streams |         |         | Output streams – Reference scenario <sup>a</sup> |           |        |         | Output streams – Alternative scenario |           |         |         |
|-------------------|------|---------------|---------|---------|--------------------------------------------------|-----------|--------|---------|---------------------------------------|-----------|---------|---------|
|                   |      | Biomass       | Air     | Water   | Ash                                              | Water-out | Steam  | EX-Gas  | Ash                                   | Water-Out | Steam   | EX-Gas  |
| Generalities      |      |               |         |         |                                                  |           |        |         |                                       |           |         |         |
| Temperature       | °C   | 26            | 26      | 32      | 936                                              | 43        | 43     | 280     | 936                                   | —         | 101     | 170     |
| Pressure          | atm  | 1             | 1       | 1       | 1                                                | 0.084     | 0.084  | 1       | 1                                     | —         | 1       | 1       |
| Flow (mass)       | kg/h | 88,712        | 360,742 | 139,426 | 1,010                                            | 2,647     | 21,880 | 448,444 | 1,010                                 | 0         | 139,426 | 448,444 |
| Flows             |      |               |         |         |                                                  |           |        |         |                                       |           |         |         |
| Sugarcane bagasse | kg/h | 88,712        | 0       | 0       | 0                                                | 0         | 0      | 0       | 0                                     | 0         | 0       | 0       |
| Ash               | kg/h | 0             | 0       | 0       | 1,010                                            | 0         | 0      | 0       | 1,010                                 | 0         | 0       | 0       |
| N <sub>2</sub>    | kg/h | 0             | 268,599 | 0       | 0                                                | 0         | 0      | 268,660 | 0                                     | 0         | 0       | 268,660 |
| O <sub>2</sub>    | kg/h | 0             | 82,286  | 0       | 0                                                | 0         | 0      | 27,366  | 0                                     | 0         | 0       | 27,366  |
| H <sub>2</sub> O  | kg/h | 0             | 5,086   | 139,426 | 0                                                | 2,647     | 21,880 | 71,228  | 0                                     | 0         | 139,426 | 71,228  |
| H <sub>2</sub>    | kg/h | 0             | <0.01   | 0       | 0                                                | 0         | 0      | <0.001  | 0                                     | 0         | 0       | <0.001  |
| CO <sub>2</sub>   | kg/h | 0             | 189     | 0       | 0                                                | 0         | 0      | 76,427  | 0                                     | 0         | 0       | 76,427  |
| CO                | kg/h | 0             | <0.03   | 0       | 0                                                | 0         | 0      | <0.005  | 0                                     | 0         | 0       | <0.005  |
| N <sub>2</sub> O  | kg/h | 0             | 0.16    | 0       | 0                                                | 0         | 0      | 0       | 0                                     | 0         | 0       | 0       |
| NO <sub>2</sub>   | kg/h | 0             | 0       | 0       | 0                                                | 0         | 0      | 1       | 0                                     | 0         | 0       | 1       |
| NO                | kg/h | 0             | 0       | 0       | 0                                                | 0         | 0      | 49      | 0                                     | 0         | 0       | 49      |
| SO <sub>2</sub>   | kg/h | 0             | 0       | 0       | 0                                                | 0         | 0      | 125     | 0                                     | 0         | 0       | 125     |
| SO <sub>3</sub>   | kg/h | 0             | 0       | 0       | 0                                                | 0         | 0      | 8       | 0                                     | 0         | 0       | 8       |
| Ar                | kg/h | 0             | 4,581   | 0       | 0                                                | 0         | 0      | 4,581   | 0                                     | 0         | 0       | 4,581   |

<sup>a</sup> In this scenario there is another stream of steam used to provide the required heat for internal purposes (95 MW heat) with a flow of 114,899 kg/h at 312 °C and 15 atm.

Source: Own elaboration.

**Table S4.** Input data and results of the blocks in the hierarchy B1.

| Equipment | Simulation block | Input data                                                                                | Results                                                              |
|-----------|------------------|-------------------------------------------------------------------------------------------|----------------------------------------------------------------------|
| DECOM     | RYield           | Temperature: 26 °C<br>Pressure: 1 atm                                                     | Heat duty: 99.5 MW                                                   |
| COMBUST   | RGibss           | Calculate option: Calculate phase equilibrium and chemical equilibrium<br>Pressure: 1 atm | Outlet temperature: 936 °C<br>Pressure: 1 atm<br>Heat duty: -99.5 kW |

Source: Own elaboration.

Table S5. shows the results of the main streams of the hierarchy BR1. These results are the same for both the reference and alternative scenarios.

**Table S5.** Results of the main streams of the hierarchy BR1.

| Parameter         | Unit | Input streams |         | Output streams |         |
|-------------------|------|---------------|---------|----------------|---------|
|                   |      | BIOMASS       | AIR     | ASH            | EX-GAS  |
| Generalities      |      |               |         |                |         |
| Temperature       | °C   | 26            | 26      | 936            | 936     |
| Pressure          | atm  | 1             | 1       | 1              | 1       |
| Flow (mass)       | kg/h | 88,712        | 360,742 | 1,010          | 448,444 |
| Flows             |      |               |         |                |         |
| Sugarcane bagasse | kg/h | 88,712        | 0       | 0              | 0       |
| Ash               | kg/h | 0             | 0       | 1,010          | 0       |
| N <sub>2</sub>    | kg/h | 0             | 268,599 | 0              | 268,660 |
| O <sub>2</sub>    | kg/h | 0             | 82,286  | 0              | 27,366  |
| H <sub>2</sub> O  | kg/h | 0             | 5,086   | 0              | 71,228  |
| H <sub>2</sub>    | kg/h | 0             | <0.01   | 0              | <0.001  |
| CO <sub>2</sub>   | kg/h | 0             | 189     | 0              | 76,427  |
| CO                | kg/h | 0             | <0.03   | 0              | <0.005  |
| N <sub>2</sub> O  | kg/h | 0             | 0.16    | 0              | 0       |
| NO <sub>2</sub>   | kg/h | 0             | 0       | 0              | 1       |
| NO                | kg/h | 0             | 0       | 0              | 49      |
| SO <sub>2</sub>   | kg/h | 0             | 0       | 0              | 125     |
| SO <sub>3</sub>   | kg/h | 0             | 0       | 0              | 8       |
| Ar                | kg/h | 0             | 4,581   | 0              | 4,581   |

Source: Own elaboration.

## Simulation of the hierarchy BR2

Figure S4 shows the simulation scheme of the hierarchy BR2 under the reference scenario, where a flow of 114,899 kg/h of steam (at 312 °C and 15 atm) is taken to cover the internal heat requirements of the sugarcane mill. In contrast, the remaining steam (24,527 kg/h) is used to generate electricity. Unlike other simulation blocks, the thermodynamic model of the heat exchanger was changed to ASME 1967 steam tables correlation (STEAM-TA) for its cold side.

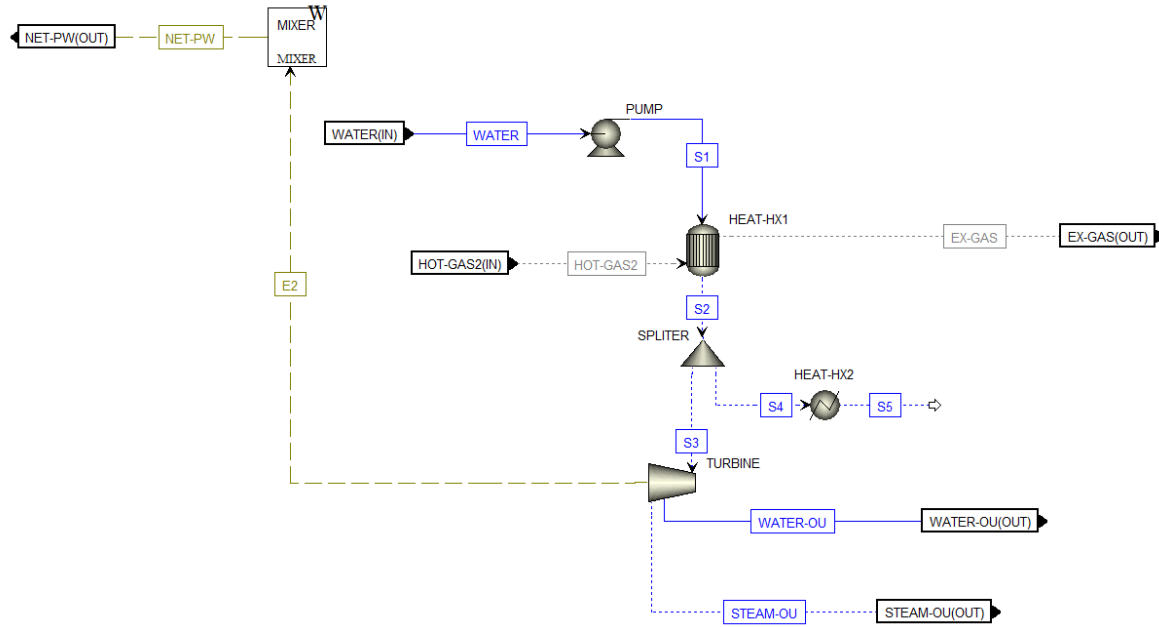

**Figure S4.** Scheme of the hierarchy BR2, the energy generation stage, under the reference scenario.

Source: Own elaboration.

Figure S5 shows the simulation scheme of the hierarchy BR2 under the alternative system, in which the total generated steam (139,426 kg/h at 526 °C and 50 atm) flows through a turbine to generate electricity. The exhaust steam leaving the turbine (at 362 °C and 15 atm) can cover the internal heat requirements of the sugarcane mill (95 MW<sub>heat</sub>). Unlike other simulation blocks, the thermodynamic model of the heat exchanger was changed to ASME 1967 steam tables correlation (STEAM-TA) for its cold side.

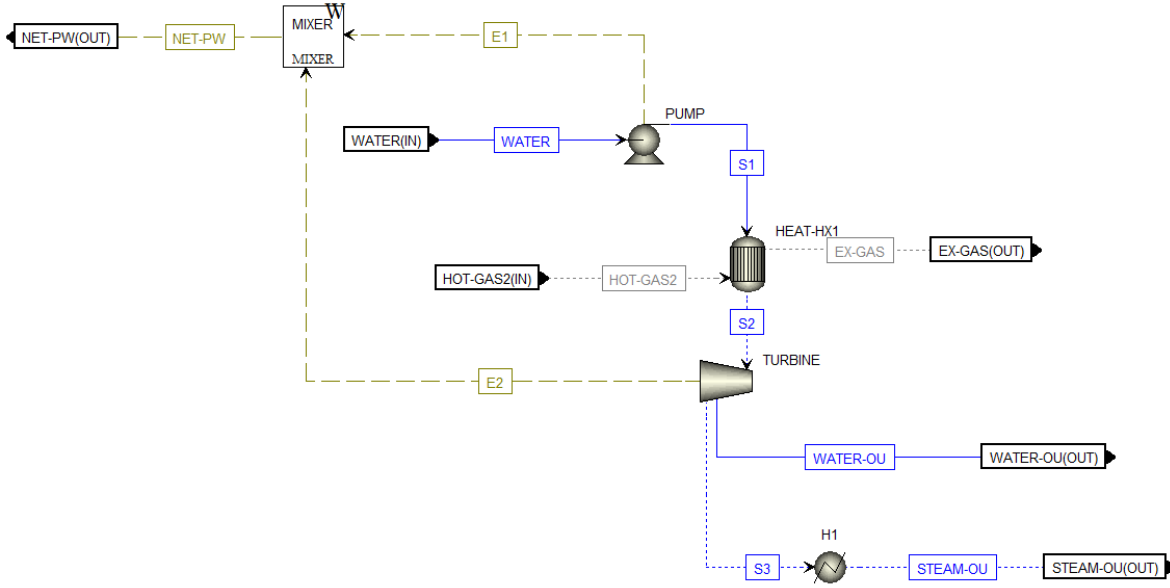

**Figure S5.** Scheme of the hierarchy BR2, the energy generation stage, under the alternative scenario.

Source: Own elaboration.

Table S6 shows the input data of the blocks simulated in this hierarchy BR2 and their results. Unless otherwise is specified, these conditions are the same for the reference and alternative scenarios.

**Table S6.** Input data and results of the blocks in the hierarchy BR2.

| Equipment | Simulation block | Input data                                                                                                                                                          | Results                                                                                                                                                                                         |
|-----------|------------------|---------------------------------------------------------------------------------------------------------------------------------------------------------------------|-------------------------------------------------------------------------------------------------------------------------------------------------------------------------------------------------|
| PUMP      | Pump             | Discharge pressure: 15 atm under the reference scenario and 50 atm under the alternative scenario<br>Efficiency: 0.85                                               | Electricity: 66.31 kW                                                                                                                                                                           |
| HEAT-HX1  | HeatX            | Hot outlet stream temperature: 280 °C under the reference scenario and 170 °C under the alternative scenario                                                        | Outlet temperature: 280 °C under the reference scenario and 170 °C under the alternative scenario<br>Heat duty: 106.7 MW under the reference scenario and 123 MW under the alternative scenario |
| TURBINE   | Compr            | Discharge pressure: 0.0835 atm under the reference scenario and 15 atm under the alternative scenario<br>Isentropic efficiency: 0.85<br>Mechanical efficiency: 0.97 | Net work required: -5 MW under the reference scenario and -12 MW under the alternative scenario                                                                                                 |

Source: Own elaboration.



## 2. Indicators Data, Assumptions and Calculations

**Table S7.** Greenhouse Gas Emissions (GHG). Inventory data and Emission factors.

| Parameter                                                   | Data      | Source     |
|-------------------------------------------------------------|-----------|------------|
| <b>Agronomic Phase</b>                                      |           |            |
| Harvested area (ha)                                         | 18,608    | [4]        |
| Sugarcane productivity (ton/ha)                             | 74.79     | [4]        |
| Bagasse in cane (%)                                         | 26        | [4]        |
| Seasonal irrigation (%)                                     | 95        | [5]        |
| Irrigation area (%)                                         | 5         | [5]        |
| Pumping irrigation (%)                                      | 5         | [5]        |
| Energy for irrigation (kWh/ha)                              | 219       | [5]        |
| Trash burning (% of harvested area)                         | 93        | [4]        |
| Dry based matter in trash (%)                               | 0.14      | [5,6]      |
| Diesel consumption (L/ha)                                   | 131       | [5,7]      |
| Nitrogen fertilization (kg/ha)                              | 105       | [5]        |
| Proportion of N to N <sub>2</sub> O (%)                     | 1         | [8]        |
| P <sub>2</sub> O <sub>5</sub> fertilization (kg/ha)         | 51        | [5]        |
| K <sub>2</sub> O fertilization (kg/ha)                      | 153       | [5]        |
| CaCO fertilization (kg/ha)                                  | 1,000     | [5]        |
| Pesticides (kg/ha)                                          | 2         | [5]        |
| <b>Transport Phase</b>                                      |           |            |
| Diesel consumption (L/ton)                                  | 2.2       | [5]        |
| <b>Industrial Phase</b>                                     |           |            |
| Sugarcane crushed (ton/year)                                | 1,342,080 | [4]        |
| Industrial productivity (% of sugar/ton of cane)            | 10.79     | [4]        |
| Industrial productivity (kg of sugar/ha)                    | 8,069.7   | Calculated |
| Sugar production (kg/ton of cane)                           | 107.9     | Calculated |
| Molasses production (ton)                                   | 45,635    | [4]        |
| Fuel oil consumption (L/ton of cane)                        | 0.6       | [4]        |
| Electricity from the grid on Reference System<br>(kWh/year) | 101,940   | [4]        |
| Lubricants (kg/ha)                                          | 0.77      | [5]        |
| Lime (kg/ha)                                                | 65.81     | [9]        |
| Molasses cost (USD/ton)                                     | 4.6       | [10]       |

**Table S7.** Greenhouse Gas Emissions (GHG). Inventory data and Emission factors (Cont.).

| Parameter                                                                         | Data   | Source        |
|-----------------------------------------------------------------------------------|--------|---------------|
| Sugar cost (USD/ton)                                                              | 46.4   | [10]          |
| Bagasse cost (USD/ton)                                                            | 1      | Questionaries |
| Proportion of electricity used in sugarcane preparation and grinding (%)          | 54     |               |
| Emission factors                                                                  |        |               |
| Emissions from electrical grid (kgCO <sub>2e</sub> /kWh)                          | 0.527  | [12]          |
| Cane trash burning emission factor (kgCO <sub>2e</sub> /kg of dry matter)         | 0.0828 | [7]           |
| Diesel emission factor (kgCO <sub>2e</sub> /L)                                    | 3.31*  | [13]          |
| Nitrogen fertilizer emission factor (kgCO <sub>2e</sub> /kg)                      | 5.88   | [14]          |
| P <sub>2</sub> O <sub>5</sub> fertilizer emission factor (kgCO <sub>2e</sub> /kg) | 1      | [14]          |
| K <sub>2</sub> O fertilizer emission factor (kgCO <sub>2e</sub> /kg)              | 0.5761 | [14]          |
| CaO fertilizer emission factor (kgCO <sub>2e</sub> /kg)                           | 0.1295 | [5]           |
| Pesticides emission factor (kgCO <sub>2e</sub> /kg)                               | 10.97  | [14]          |
| Fuel oil emission factor (kgCO <sub>2e</sub> /L)                                  | 3.3**  | [14]          |
| Bagasse emission factor (kgCO <sub>2e</sub> /kg)                                  | 0.025  | [6]           |
| Lubricants emission factor (kgCO <sub>2e</sub> /kg)                               | 0.947  | [5]           |
| Lime emission factor (kgCO <sub>2e</sub> /kg)                                     | 1.03   | [5]           |

\*Considers 43.1 MJ/kg of LHV and 832 kg/m<sup>3</sup> of density.

\*\*Considers 39.3 MJ/L of LHV

**Table S8.** Emission of particulate matter. Inventory data and Emission factors.

| Parameter                                              | Data   | Source |
|--------------------------------------------------------|--------|--------|
| <b>Agronomic Phase</b>                                 |        |        |
| Harvested area (ha)                                    | 18,608 | [4]    |
| Sugarcane productivity (ton/ha)                        | 74.79  | [4]    |
| Bagasse in cane (%)                                    | 26     | [4]    |
| Trash burning (% of harvested area)                    | 93     | [4]    |
| <b>Emission factors</b>                                |        |        |
| PM trash burning emission factor (kg/kg of trash)      | 1.81   | [15]   |
| PM bagasse burning emission factor (kg/ton of bagasse) | 0.63   | [16]   |
| PM fueloil g/kWh                                       | 2.61   | [17]   |

**Table S9.** Direct jobs. Inventory data.

| Parameter                                                     | Data      | Source                       |
|---------------------------------------------------------------|-----------|------------------------------|
| <b>Agronomic Phase</b>                                        |           |                              |
| Jobs on the sugarcane cultivation<br>(temporary for 3 months) | 3000      | Questionaries                |
| Days of work in sugarcane cultivation (days/year)             | 90        | Questionaries                |
| Jobs on the sugarcane harvest<br>(temporary for 5 months)     | 4167      | Questionaries                |
| Days of work in sugarcane harvest (days/year)                 | 150       | Questionaries                |
| <b>Transport Phase</b>                                        |           |                              |
| Jobs on the sugarcane transport<br>(temporary for 5 months)   | 492       | Questionaries                |
| Days of work in sugarcane transportation (days/year)          | 150       | Questionaries                |
| <b>Industrial Phase</b>                                       |           |                              |
| Jobs in the Zafra period<br>(temporary for 5 months)          | 636       | Questionaries                |
| Days of work in the Zafra period (days/year)                  | 154       | Questionaries                |
| Jobs in the Reparation period<br>(temporary for 7 months)     | 456       | Questionaries                |
| Days of work in the Reparation period (days/year)             | 211       | Questionaries                |
| Cane processed (ton/year)                                     | 1,342,080 | [4]                          |
| Electricity generation Reference System (kWh/ton of cane)     | 15.11     | [4]                          |
| Electricity generation Alternative System (kWh/ton of cane)   | 36.21     | Calculated (simulation data) |

**Table S10.** Net Present Value (NPV).

| <b>Technical data</b>                                | <b>unit</b> | <b>CBS</b>  | <b>EBS</b>   | <b>Sources</b>                  |
|------------------------------------------------------|-------------|-------------|--------------|---------------------------------|
| Capacity                                             | MW          | 5           | 12           | Simulation data                 |
| Electricity produced                                 | kWh/y       | 21,031,022  | 50,389,774.1 | Calculated<br>(simulation data) |
| <b>Economic Data</b>                                 |             |             |              |                                 |
| Investment Cost                                      |             |             |              |                                 |
| Power generation system cost per unit                | USD2018/ MW |             | 1,200,000    | [18]                            |
| Power generation system cost                         | USD2017     | 5,874,865.4 | 14,099,676.9 | Calculated<br>(simulation data) |
| <b>Operation and Maintenance Costs</b>               |             |             |              |                                 |
| Water quantity                                       | L/y         | 590,749,688 | 590,749,688  | Questionaries                   |
| Unit cost of water                                   | USD2017/ L  | 2           | 2            | Questionaries                   |
| Cost of water used per year                          | USD2017     | 29,921.5    | 29,921.5     | * Simulation.                   |
| O&M Cost<br>(Percentage of cost of capital per year) |             | 0           |              |                                 |
| Workforce                                            | USD2017/y   | 253,000     | 359,260      | [19]                            |
| Equipment maintenance - boiler and turbines          | USD2017/y   | 176,246     | 422,990.3    | [20,21]                         |

### C. Questionnaire

|                                                                                                        |                                                                                         |
|--------------------------------------------------------------------------------------------------------|-----------------------------------------------------------------------------------------|
| <b>Social Indicator that apply to all LCA stages: agricultural, transport, industrial and end-use.</b> |                                                                                         |
|                                                                                                        | <b>Incidences of occupational injuries</b>                                              |
| 1                                                                                                      | How often are there absences due to accidents or illnesses? by stage (# accidents/year) |
| <b>The following questions apply only to the Industrial stage</b>                                      |                                                                                         |
| <b>Social Indicators</b>                                                                               |                                                                                         |
|                                                                                                        | <b>Employment</b>                                                                       |
| 2                                                                                                      | How many workers oversee the cogeneration system (total for all shifts)?                |
| 3                                                                                                      | How many shifts are there?                                                              |
|                                                                                                        | <b>Average annual income per capita</b>                                                 |
| 4                                                                                                      | How much is the annual per capita income of the repair staff? (\$)                      |
|                                                                                                        | <b>Training level</b>                                                                   |
| 5                                                                                                      | How many of the repair staff have a bachelor's degree or higher?                        |
| <b>Environmental Indicators</b>                                                                        |                                                                                         |
| 6                                                                                                      | <b>Water Consumption (L/ton sugarcane)</b>                                              |
| 7                                                                                                      | Is water used for sugarcane washing?                                                    |
| 8                                                                                                      | Amount of water used for sugarcane washing (m/ton sugarcane)                            |
| 9                                                                                                      | Is any reagent, chemical added?                                                         |
| 10                                                                                                     | If so, what is the reagent?                                                             |
| 11                                                                                                     | Specify the quantity of this reagent, chemical (L or kg/ton sugarcane).                 |
| 12                                                                                                     | Does the wastewater receive any treatment? Which one?                                   |
| 13                                                                                                     | Where the wastewater goes?                                                              |
| 14                                                                                                     | Do you have a wastewater treatment plant?                                               |
|                                                                                                        | <b>Water treatment plant</b>                                                            |
| 15                                                                                                     | With which water quality standards does your treated water comply?                      |
| 16                                                                                                     | What type of treatment plant is it?                                                     |
|                                                                                                        | <b>Specify the parameters of the water input to the WWTP</b>                            |
| 17                                                                                                     | Litres of treated water (L/s)                                                           |
| 18                                                                                                     | Total suspended solids (mg/L)                                                           |
| 19                                                                                                     | Chemical Oxygen Demand (mg/L)                                                           |
| 20                                                                                                     | Total Nitrogen (mg/L)                                                                   |
|                                                                                                        | <b>Specify the following discharge parameters, outlet of the WWTP</b>                   |
| 21                                                                                                     | Litres of water discharged (L/s)                                                        |
| 22                                                                                                     | Total Suspended Solids (mg/L)                                                           |
| 23                                                                                                     | Chemical Oxygen Demand (mg/L)                                                           |
| 24                                                                                                     | Total Nitrogen (mg/L)                                                                   |
| 25                                                                                                     | % Removal                                                                               |

|                                                            |                                                                                      |
|------------------------------------------------------------|--------------------------------------------------------------------------------------|
| 26                                                         | Residual sludge (kg/ton sugarcane)                                                   |
| 27                                                         | How much electrical energy is consumed at the WWTP? (kWh/L treated water)            |
|                                                            | <b>Water for steam generation</b>                                                    |
| 28                                                         | Amount of water used for steam generation (L/ton sugarcane)                          |
| <b>Electricity consumption</b>                             |                                                                                      |
| 29                                                         | Is disaggregated electricity consumption available?                                  |
|                                                            | <b>Specify by process</b>                                                            |
| 30                                                         | Milling (kWh/ton sugarcane)                                                          |
| 31                                                         | Process (kWh/ton sugarcane)                                                          |
| 32                                                         | Process (kWh/ton sugarcane)                                                          |
| <b>Air Emissions (from bagasse combustion in a boiler)</b> |                                                                                      |
| 33                                                         | Is PROY-NOM-70-SEMARNAT-07 being followed?                                           |
| 34                                                         | Does this sugarmill comply with the emission limits?                                 |
| 35                                                         | What is the nominal thermal capacity of the boiler? (GJ/h)                           |
| 36                                                         | Specify the parameters related to the combustion of ton of bagasse sugarcane bagasse |
| 37                                                         | Particulate Matter (mg/m)                                                            |
| 38                                                         | Carbon monoxide (ppmv)                                                               |
| 39                                                         | Sulphur dioxide (ppmv)                                                               |
| 40                                                         | Nitrogen oxides (ppmv)                                                               |
| <b>Ash management</b>                                      |                                                                                      |
| 41                                                         | How much ash is generated? (ton/ton bagasse)                                         |
| 42                                                         | What type of treatment does it receive?                                              |
| 43                                                         | Is it transported to a confinement site?                                             |
| 44                                                         | Distance to the confinement site (km/ton ash)                                        |
| 45                                                         | Type of vehicle used for transport (trailer, truck, van, etc.)                       |
| 46                                                         | Total capacity (tons)                                                                |
| 47                                                         | Type of fuel used (diesel or gasoline or other)                                      |
| 48                                                         | Trips made to transport one ton of ash per ton of bagasse                            |
| 49                                                         | Are ashes transported to a treatment site?                                           |
| 50                                                         | Distance to treatment site (km/ton ash)                                              |
| 51                                                         | Type of vehicle used for transport (trailer, truck, van, etc.)                       |
| 52                                                         | Capacity (ton)                                                                       |
| 53                                                         | Type of fuel used (diesel or gasoline or other)                                      |
| 54                                                         | Trips made to transport one ton of ash per ton of bagasse                            |
| <b>Bagasse sludge</b>                                      |                                                                                      |
| 54                                                         | How much bagasse sludge is generated? (ton/ton of bagasse)                           |
| 55                                                         | What type of treatment does it receive?                                              |
| 56                                                         | Is it transported to a site?                                                         |
| 57                                                         | Distance to treatment site (km/ton bagasse sludge)                                   |

|                              |                                                                                                                   |
|------------------------------|-------------------------------------------------------------------------------------------------------------------|
| 58                           | Type of vehicle used for transport                                                                                |
| 59                           | Capacity (ton)                                                                                                    |
| 60                           | Type of fuel used (diesel or gasoline or other). Trips made (ton)                                                 |
| 61                           | Trips made to transport one ton of bagasse sludge per ton of bagasse                                              |
| <b>Boiler operation data</b> |                                                                                                                   |
|                              | <b>Current boiler operating conditions</b>                                                                        |
| 62                           | Operating time (hours/year)                                                                                       |
| 63                           | Amount of bagasse burned (ton/hour)                                                                               |
| 64                           | Amount of electricity generated from one ton of bagasse (kWh/ton bagasse)                                         |
| 65                           | Voltage and current of this electricity (V) and (A)                                                               |
| 66                           | Combustion temperature (°C)                                                                                       |
| 67                           | Pressure (bar)                                                                                                    |
| 68                           | Gas flow (kg/hour)                                                                                                |
| 69                           | Does the steam directly go to turbines for electricity generation? Specify quantity or what percentage            |
| 70                           | Goes to other turbomachinery or to Heat in the sugar manufacturing process? Specify quantity and what percentages |
| <b>Steam turbine</b>         |                                                                                                                   |
| 71                           | Initial conditions of the steam entering the turbine                                                              |
| 72                           | Final conditions of the steam exiting the turbine                                                                 |
| 73                           | Is the steam output condensed or is it released to the atmosphere?                                                |
| <b>Economic Indicators</b>   |                                                                                                                   |
| 74                           | What is the selling price of molasses? (\$/ton molasses)                                                          |
| 75                           | What is the selling price of sugar? (\$/ton sugar)                                                                |
| 76                           | What is the selling price of bagasse? (\$/ton bagasse)                                                            |
| 77                           | What is the selling price of sugarcane juice? (\$/ton juice)                                                      |
| 78                           | How much do you pay to CFE for each kWh? (\$/kWh)                                                                 |
| 79                           | How much do you pay for fuel oil? (\$/litre)                                                                      |
| 80                           | How much do you pay for water? (\$/m)                                                                             |
| 81                           | What is the operation and maintenance cost of the cogeneration system (including boiler)? (\$/ton sugarcane)      |
| 82                           | Do you know the amount of investment in a cogeneration system like the one you currently have?                    |
| 83                           | What is the cost at which the mill buys sugarcane from producers?                                                 |
| 84                           | What is the cost of handling the bagasse before it is used in the boiler?                                         |

## References

1. AverageWeather. Veracruz - Faros. Available online: <https://www.average-weather.com/es/norteam%C3%A9rica/m%C3%A9xico/veracruz/veracruz+-+faros/> (accessed on 30 August 2020).
2. Lenntech. Calculador. Humedad Relativa. Available online: <https://www.lenntech.es/calculadoras/humedad/humedad-relativa.htm> (accessed on 25 July 2019).
3. Aspentech. Aspen Plus. Getting Started Modeling Processes with Solids. Available online: [http://profsite.um.ac.ir/~fanaei/\\_private/Solids%208\\_4.pdf](http://profsite.um.ac.ir/~fanaei/_private/Solids%208_4.pdf) (accessed on 28 September 2020).
4. Unión Nacional de Cañeros A.C. Central Motzorongo. Available online: <http://caneros.org.mx/download/central-motzorongo/> (accessed on 27 July 2020).
5. García, C.A.; García-Treviño, E.S.; Aguilar-Rivera, N.; Armendáriz, C. Carbon Footprint of Sugar Production in Mexico. *J. Clean. Prod.* **2016**, *112*, 2632–2641, doi:10.1016/j.jclepro.2015.09.113.
6. Khatiwada, D.; Silveira, S. Greenhouse Gas Balances of Molasses Based Ethanol in Nepal. *J. Clean. Prod.* **2011**, *19*, 1471–1485, doi:10.1016/j.jclepro.2011.04.012.
7. Yuttitham, M.; Gheewala, S.H.; Chidthaisong, A. Carbon Footprint of Sugar Produced from Sugarcane in Eastern Thailand. *J. Clean. Prod.* **2011**, *19*, 2119–2127, doi:10.1016/j.jclepro.2011.07.017.
8. Intergovernmental Panel on Climate Change (IPCC). 2006 IPCC Guidelines for National Greenhouse Gas Inventories. Volume 4. Agriculture, Forestry and Other Land Use. Available online: <https://www.ipcc-nggip.iges.or.jp/public/2006gl/vol4.html> (accessed on 13 February 2020).
9. Seabra, J.E.A.; Macedo, I.C.; Chum, H.L.; Faroni, C.E.; Sarto, C.A. Life Cycle Assessment of Brazilian Sugarcane Products: GHG Emissions and Energy Use. *Biofuels, Bioprod. Biorefining* **2011**, *5*, 519–532, doi:10.1002/bbb.289.
10. Amezcua-Allieri, M.A.; Martínez-Hernández, E.; Anaya-Reza, O.; Magdaleno-Molina, M.; Melgarejo-Flores, L.A.; Palmerín-Ruiz, M.E.; Eguía-Lis, J.A.Z.; Rosas-Molina, A.; Enríquez-Poy, M.; Aburto, J. Techno-Economic Analysis and Life Cycle Assessment for Energy Generation from Sugarcane Bagasse: Case Study for a Sugar Mill in Mexico. *Food Bioprod. Process.* **2019**, *118*, 281–292, doi:10.1016/j.fbp.2019.09.014.
11. Rojas Cárdenas, J.C. Consumo y Alternativas Energéticas de La Industria Azucarera Mexicana. Tesis de Maestría, Universidad Nacional Autónoma de México: Ciudad de México, 2014.
12. Comisión Reguladora de Energía (CRE). Factor de Emisión Del Sistema Eléctrico Nacional 2018. Available online: [https://www.gob.mx/cms/uploads/attachment/file/442910/Aviso\\_Factor\\_de\\_Emisiones\\_2018.pdf](https://www.gob.mx/cms/uploads/attachment/file/442910/Aviso_Factor_de_Emisiones_2018.pdf) (accessed on 22 April 2021).
13. GREET.Net Model Software. The Greenhouse Gases, Regulated Emissions, and Energy Use in Technologies Model. Available online: <https://greet.es.anl.gov/> (accessed on 13 May 2020).
14. Co-funded by the Intelligent Energy Europe. Programme of the European Union. Biograce GHG Calculation Tool Available online: <https://www.biograce.net/> (accessed on 15 January 2020).
15. Mugica-Álvarez, V.; Hernández-Rosas, F.; Magaña-Reyes, M.; Herrera-Murillo, J.; Santiago-De La Rosa, N.; Gutiérrez-Arzaluz, M.; de Jesús Figueroa-Lara, J.; González-Cardoso, G. Sugarcane Burning Emissions: Characterization and Emission Factors. *Atmos. Environ.* **2018**, *193*, 262–272, doi:10.1016/j.atmosenv.2018.09.013.
16. Environmental Protection Agency. Chapter 1. External Combustion Sources Available online: [www.epa.gov/sites/default/files/2020-09/documents/1.8\\_bagasse\\_combustion\\_in\\_sugar\\_mills.pdf](http://www.epa.gov/sites/default/files/2020-09/documents/1.8_bagasse_combustion_in_sugar_mills.pdf) (accessed on 30 September 2020).
17. Santoyo-Castelazo E.; Gujba, H.; Azapagic, A. Life Cycle Assessment of Electricity Generation in Mexico. *Energy* **2011**, *36*, 1488–1499, doi:https://doi.org/10.1016/j.energy.2011.01.018.
18. International Renewable Energy Agency (IRENA). *Renewable Power Generation Costs in 2018*; IRENA: Abu Dhabi, Emiratos Árabes Unidos, 2019; p. 88;.



19. Van Den Broek, R.; Van Den Burg, T.; Van Wijk, A.; Turkenburg, W. Electricity Generation from Eucalyptus and Bagasse by Sugar Mills in Nicaragua: A Comparison with Fuel Oil Electricity Generation on the Basis of Costs, Macro-Economic Impacts and Environmental Emissions. *Biomass and Bioenergy* **2000**, *19*, 311–335, doi:10.1016/S0961-9534(00)00034-9.
20. International Renewable Energy Agency (IRENA). Renewable Energy Technologies: Cost Analysis Series. Available online: [https://www.irena.org/-/media/Files/IRENA/Agency/Publication/2012/RE\\_Technologies\\_Cost\\_Analysis-BIOMASS.pdf](https://www.irena.org/-/media/Files/IRENA/Agency/Publication/2012/RE_Technologies_Cost_Analysis-BIOMASS.pdf) (accessed on 22 April 2021).
21. Abdoli, M.A.; Amidpour, M.; Vahidi, H.; Gitipour, S.; Mohammadi, F. Environmental-Economic Evaluation of Sugar Cane Bagasse Gasification Power Plants versus Combined-Cycle Gas Power Plants. *Glob. J. Environ. Sci. Manag.* **2020**, *6*, 73–84, doi:10.22034/gjesm.2020.01.06.
